# Supplementary material
Source: Springer Nature journal article supplement (https://www.springermedizin.de/resource/supplementary/12943_2010_601_MOESM5_ESM.pdf/9555084)

A

|         |     |            |             |            |             |            |     |
|---------|-----|------------|-------------|------------|-------------|------------|-----|
| mm9     | 1   | GTGCCTGGCA | CTGCTTCAGC  | CTGACAATGT | tcctcccgct  | -----CCAC  | ↓   |
| rn4     | 1   | gcgctgttg  | ctg-----    | -----      | -----       | -----      |     |
| hg18    | 1   | GTGCCTGGCC | CTGCTTCAGC  | CTGACATTGT | CCAAGCCTCC  | CCCAGCCCAC |     |
| calJac1 | 1   | GTGCCTGGCC | CTACTTCAGC  | CTGATGTTG- | CCAATGCTCC  | CCCAACCTAC |     |
| equCab1 | 1   | GTACCTGGCC | CTGCTCCCCT  | CTGACATTGT | CCAActg--CC | CCCAACCCAC |     |
|         |     |            |             |            |             |            |     |
| mm9     | 45  | ATGTAAAAAC | TCTAGGCCCC  | ACTTCTCCTT | TTCAGGTATa  | aatccggcTT |     |
| rn4     | 14  | -----C     | TCCAGGCCCC  | ACTTCTCCTT | TTCAGATATg  | cggcatcccc |     |
| hg18    | 51  | TCCTAAAATG | GCCAGGCCCC  | ACTTCTtcc- | --CAGGTGGG  | CTACATT-TT |     |
| calJac1 | 50  | TCCTAAAATG | CCCAGTCCCC  | ACTTCCCCTT | TTCAGGTGGg  | acACATT-TT |     |
| equCab1 | 49  | TCCTAAAACG | TCAAGGCCCTC | ACTTCTCTTT | TTCAGGTGGT  | CCCCTG-CT  |     |
|         |     |            |             |            |             |            |     |
| mm9     | 95  | TTGCTGTCCC | ctaccgCACT  | TCCTTCCCTT | TTCTCTTTAA  | ACCTGAcgTC |     |
| rn4     | 55  | agca-----  | -----CACT   | TCCTTCCCTC | TTCTCTTTAA  | ACCTGAcAtC |     |
| hg18    | 97  | CTGCTGTCCC | GGTCC-CACT  | TCCTTACCTT | TTCTCCTTAA  | ATCTGATTTT |     |
| calJac1 | 99  | CTGCTGTCCC | GGTCC-CATT  | TCCTTTCCTT | TTCTCCTTAA  | ATCTGATCTC |     |
| equCab1 | 98  | CTGCTGTCTG | GGTCC-CACT  | TCCTTCCCTT | TTCTCT----  | ----GATTTT |     |
|         |     |            |             |            |             |            |     |
| mm9     | 145 | ACCGTGGGGA | TTGGGgacgg  | cacagTGGAT | GAAAACCCCT  | CTTCTCTTTA | ↙ ↘ |
| rn4     | 93  | ACTGCAGGGA | TTGGGatggc  | gtagcTGGAT | GAAAACCCCT  | CTTCTCccA  |     |
| hg18    | 146 | ACTGTGAGGG | TGGGAGGTTG  | GGCAGAGGGG | TGAAAACCCCT | CTTCCCCTTA |     |
| calJac1 | 148 | ATTGTGGGGG | TGGGAGGTTG  | GGCAGATGGG | TGAAGACcaT  | CTTCCCCTTA |     |
| equCab1 | 139 | ACTGCAGGGG | TTGGGtaggt  | -----      | -----       | -----      |     |

- Core of ETS1 factor binding site
- Core of TATA binding factor
- Core of IFN regulatory factor binding site
- Core of XCPE factor binding site
- Core of MZF1 binding site

B

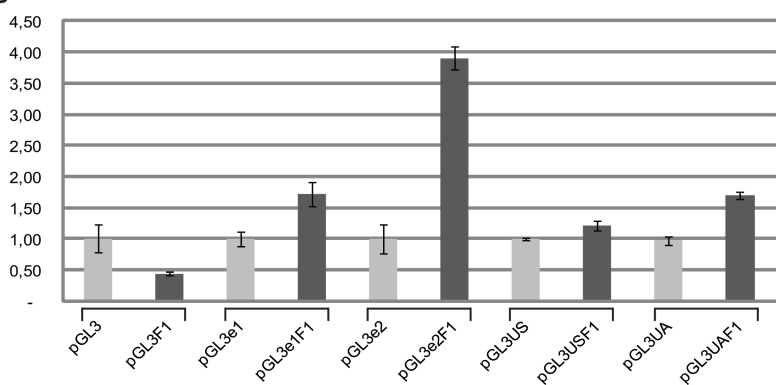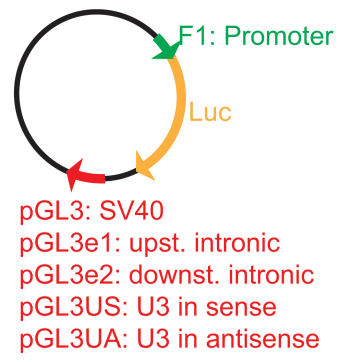

Supplement: MOESM5 [file 9555084]
